# Supplementary material for: A Smart Mobile Health Tool Versus a Paper Action Plan to Support Self-Management of Chronic Obstructive Pulmonary Disease Exacerbations: Randomized Controlled Trial
Source: PubMed Central journal article supplement (PMC6811767; doi:10.2196/14408), 2019-10-09
Supplement: mhealth_v7i10e14408_app1.pdf [file mhealth_v7i10e14408_app1.pdf]

## Multimedia Appendix 1. Contents of the mHealth tool.

---

| <b>Questions on symptoms and medication use</b>                    | <b>Answers</b>       |
|--------------------------------------------------------------------|----------------------|
| <b>In comparison to normal, do you today .....</b>                 |                      |
| 1. ..experience more shortness of breath?                          | YES/NO               |
| 2. ..experience more fear because of your shortness of breath?     | YES/NO               |
| 3. ..experience more fatigue?                                      | YES/NO               |
| 4. ..feel more hindered by your COPD during your daily activities? | YES/NO               |
| 5. ..experience more sputum in you airways?                        | YES/NO               |
| 6. ..notice any difference in your sputum colour/composition?      | YES/NO               |
| 7. ..experience more wheezing?                                     | YES/NO               |
| 8. ..experience more coughing?                                     | YES/NO               |
| 9. ..have a sore throat?                                           | YES/NO               |
| 10. ..have a cold or a runny nose?                                 | YES/NO               |
| 11. ..experience more stress or tension?                           | YES/NO               |
| 12. ..have used more of your bronchodilators?                      | YES/NO               |
| <hr/> <b>Questions on physiological measurements</b>               |                      |
| 1. What is your temperature in degrees Celsius?                    | __._ (Example: 37.2) |
| 2. What is your FEV1 in litres?                                    | _.__ (Example: 1.31) |
| 3. What is your SpO2 in percentages?                               | __ (Example: 95)     |

---
